1 Title: **DectiSomes: Glycan Targeting of Liposomal Drugs Improves the Treatment**  
2 **of Disseminated Candidiasis**

3

4 Running Title: **Targeted antifungal liposomes**

5 Suresh Ambati\*, Tuyetnhu Phan^, Zachary A. Lewis^, Xiaorong Lin^, Richard B.

6 Meagher\*#

7 \*Department of Genetics, University of Georgia, Athens, GA. 30602.

8 ^Department of Microbiology, University of Georgia, Athens, GA. 30602.

9 #Corresponding author, meagher@uga.edu.

10

11 Prepared for Antimicrobial Agents and Chemotherapy

12

13

14

## 15 **ABSTRACT**

16 *Candida albicans* causes life-threatening disseminated candidiasis. Individuals at  
17 greatest risk have weakened immune systems. An outer cell wall, exopolysaccharide  
18 matrix, and biofilm rich in oligoglucans and oligomannans help *Candida spp.* evade host  
19 defenses. Even after antifungal drug treatment the one-year mortality rate exceeds  
20 25%. Undoubtedly there is room to improve antifungal drug performance. The  
21 mammalian C-type lectin pathogen receptors Dectin-1 and Dectin-2 bind to fungal  
22 oligoglucans and oligomannans, respectively. We previously coated amphotericin B-  
23 loaded liposomes, AmB-LLs, pegylated analogs of AmBisome, with the ligand binding  
24 domains of these two Dectins. DectiSomes, DEC1-AmB-LLs and DEC2-AmB-LLs,  
25 showed two distinct patterns of binding to the exopolysaccharide matrix surrounding *C.*  
26 *albicans* hyphae grown in vitro, while untargeted AmB-LLs did not bind. DectiSomes  
27 were preferentially associated with fungal colonies in the kidneys. In a neutropenic  
28 mouse model of candidiasis, DEC1-AmB-LLs and DEC2-AmB-LLs delivering only one  
29 dose of 0.2 mg/kg AmB significantly reduced the kidney fungal burden several fold  
30 relative to AmB-LLs, based on either colony forming units ( $P= 0.013$  to  $8.8 \times 10^{-5}$ ) or  
31 quantitative PCR of fungal rRNA ITS ( $P= 5.5 \times 10^{-5}$  to  $3.0 \times 10^{-10}$ ). DEC1-AmB-LLs and  
32 DEC2-AmB-LLs significantly increased the percent of surviving mice relative to AmB-  
33 LLs. Dectin-2 targeted anidulafungin loaded liposomes and AmBisomes, DEC2-AFG-  
34 LLs and DEC2-AmBisome reduced fungal burden in the kidneys several fold over their  
35 untargeted counterparts ( $P=7.8 \times 10^{-5}$  and 0.0020, respectively). The data herein  
36 suggest that targeting of a variety of antifungal drugs to fungal glycans may achieve

37 lower safer effective doses and improve drug efficacy against a variety of invasive  
38 fungal infections.

39

40 **KEY WORDS**

41 Candida, candidiasis, targeted delivery of antifungals, Dectin, DectiSomes,

42 anidulafungin

## 43 **Introduction**

44 Invasive candidiasis is among top 4 most life-threatening fungal diseases (1-5).  
45 Most *Candida species* that cause disseminated candidiasis such as *C. albicans* and *C.*  
46 *glabrata* are commensals that are commonly found in the gastrointestinal and urinary  
47 tracts and rarely cause invasive infections in healthy people. However  
48 immunocompromised individuals such as patients on immunosuppressants as part of  
49 cancer treatment or cell or organ transplant therapy are particularly susceptible (6-8).  
50 Candidiasis is the most common invasive fungal disease of HIV patients who developed  
51 AIDS (9, 10). Even with antifungal drug therapy, the one-year mortality rate with  
52 disseminated candidiasis ranges from 25% to 40%, depending upon the patient's  
53 underlying conditions (3, 5, 9, 11-14). When *Candida* infections spread to the central  
54 nervous system and brain, the mortality rate approaches 90% (15). The annual medical  
55 costs from disseminated *Candida spp.* infections in the U.S. were recently estimated at  
56 3 billion dollars, a third of the cost to treat all fungal diseases, and representing 45% of  
57 the U.S. hospitalizations from fungal infections (4, 16). Per patient treatment costs for  
58 candidiasis range from 40,000 to 150,000 U.S. dollars (3, 5, 16-18). Clearly, there is a  
59 considerable need for improved antifungal drug performance.

60 Recommended antifungals drugs to treat invasive candidiasis include the polyenes  
61 (e.g., amphotericin B, AmB), echinocandins (e.g. anidulafungin, AFG), azoles (e.g.,  
62 fluconazole, fluoropyrimidines (e.g., flucytosine) or combinations of these (19-22). Most  
63 are fungicidal, while most azoles are fungistatic and genetic resistance to all but AmB  
64 are serious emerging problems. AmB was the first to be used to treat invasive  
65 candidiasis, but at effective doses and with extended treatment times, AmB and other

66 polyenes cause renal toxicity in many patients (23-25). Because of its nephrotoxicity,  
67 AmB has been replaced by echinocandins such as AFG as the first line clinical  
68 treatment (19, 22). Lowering the effective doses of AmB and AFG, would dramatically  
69 expand our treatment options for candidiasis.

70 AmB is amphiphobic and quite insoluble in aqueous solutions, therefore clinical  
71 formulations often include AmB loaded into the non-polar interior of detergent micelles  
72 (e.g., AmB-DOC) or intercalated into the bilipid membrane of liposomes (e.g., un-  
73 pegylated AmBisome or our pegylated version AmB-LLs (26, 27)). Current antifungal  
74 preparations used in the clinic have the disadvantage that they deliver drug to fungal  
75 and host cells alike, and have little specificity for fungal cells. We define DectiSomes as  
76 liposomes coated with a protein that targets them to a pathogenic cell, thereby  
77 increasing drug concentrations in the vicinity of the pathogen and away from host cells  
78 (28). We previously made two classes of DectiSomes, DEC1-AmB-LLs and DEC2-  
79 AmB-LLs, by coating AmB-LLs with the carbohydrate recognition domains of Dectin-1  
80 (27) or Dectin-2 (26). Dectin-1 (*CLEC7A*) and Dectin-2 (*CLEC4E*) are human pathogen  
81 receptors expressed on the surface of various leukocytes that recognize fungal beta-  
82 glucan and alpha-mannan containing oligosaccharides, respectively. Both glycans, the  
83 ligands for targeting by these two classes of DectiSomes are expressed in cell walls,  
84 glycoproteins, exopolysaccharide matrices, and/or biofilms of most pathogenic fungi,  
85 including *Candida spp.* (29). In vitro studies show that relative to untargeted AmB-LLs,  
86 DEC2-AmB-LLs bind to different developmental stages of *C. albicans*, bind 100-fold  
87 more strongly, and bind primarily to oligomannans in their extracellular matrix.  
88 Furthermore, DEC2-AmB-LLs kill or inhibit the growth of *Candida* cells one to two

89 order(s) of magnitude more effectively than AmB-LLs (26). Using a neutropenic mouse  
90 model of pulmonary aspergillosis DEC2-AmB-LLs were significantly more effective at  
91 reducing fungal burden of *Aspergillus fumigatus* in the lungs and improving mouse  
92 survival than AmB-LLs (30). Herein, we examine the efficacy of these same  
93 DectiSomes to control *C. albicans* in a neutropenic mouse model of disseminated  
94 candidiasis. Also included are the preparations and initial examinations of AFG loaded  
95 DectiSomes and Dectin-targeted AmBisome.

96

## 97 RESULTS

98 **DectiSomes bind efficiently to in vitro grown *C. albicans* hyphae.** The binding  
99 of DEC1-AmB-LLs to *C. albicans* has not been studied in as much detail (27) as DEC2-  
100 AmB-LL binding (26). The binding of rhodamine A tagged DEC1-AmB-LLs and DEC2-  
101 AmB-LLs to *C. albicans* hyphae grown in vitro is compared in **Fig. 1**. By measuring the  
102 area of red liposome fluorescence from large numbers of epifluorescence images we  
103 quantified the binding data for each liposomal type. Both Dectin-1- and Dectin-2-  
104 targeted liposomes bound at least 100-fold more efficiently than our pegylated analog of  
105 AmBisome, AmB-LLs (**Fig. 1D**,  $P = 4.0 \times 10^{-6}$  and  $4.5 \times 10^{-6}$ , respectively). Bovine Serum  
106 Albumin coated liposomes, BSA-AmB-LLs, also did not bind at significant levels. The  
107 binding efficiency of the two different Dectin targeted liposomes was not statistically  
108 distinguishable ( $p = 0.18$ ). However, their binding patterns differed. DEC1-AmB-LLs  
109 appeared to target exopolysaccharide distally associated with hyphae (**Fig. 1A**), while  
110 DEC2-AmB-LLs appeared to bind exopolysaccharide more proximally associated with  
111 hyphae and more evenly distributed throughout colonies of filamentous cells (**Fig. 1B**).

112           **A neutropenic mouse model of disseminated candidiasis.** We employed a  
113 neutropenic mouse model of immunosuppression to insure reproducible and  
114 sustainable invasive *C. albicans* infections were established in all mice (31-34).  
115 Neutropenic mice were infected by the intravenous injection of *C. albicans* yeast cells  
116 on Day zero (D0) and subsequently treated with an intravenous injection(s) of DEC1-  
117 AmB-LLs or DEC2-AmB-LLs, AmB-LLs, or liposome dilution buffer at various times post  
118 infection (PI). The regimens for immunosuppression, infection, treatment and assays  
119 are diagrammed in **Supplemental Fig. S1**. The relative effects of treating with targeted  
120 and untargeted liposomes or buffer were quantified by measuring the association of  
121 liposomes with *C. albicans* infection centers in kidneys, the fungal burden in kidneys,  
122 and mouse survival.

123           **DectiSomes associate with *C. albicans* infection centers in the kidneys.** The  
124 goal of this experiment was to demonstrate that DEC1-AmB-LLs and DEC2-AmB-LLs  
125 are preferentially associated with *C. albicans* cells in infected kidneys as compared to  
126 untargeted AmB-LLs. Neutropenic mice were intravenously infected with  $7.5 \times 10^6$  *C.*  
127 *albicans* yeast cells on D0 and then given two subsequent intravenous doses of  
128 rhodamine B tagged targeted DEC1-AmB-LLs, DEC2-AmB-LLs or untargeted AmB-LLs  
129 delivering 0.4 mg/kg AmB on 3 hr PI and D1 24 hr PI (**Supplemental Fig. SF1A**). This  
130 amounted to 0.83 mg/kg Dectin protein per treatment for each class of DectiSomes. On  
131 D3 72 hr PI kidneys were harvested and fresh tissue was hand sectioned. Fungal chitin  
132 was stained with calcofluor white (CW) to identify infection centers and the surface of  
133 the tissue was examined top down by epifluorescence. The majority of kidney sections  
134 contained a few to a dozen CW-stained infection centers of approximately 100 to 400

135 microns in diameter (**Fig. 2**). The rhodamine red fluorescence of DEC1-AmB-LLs,  
136 DEC2-AmB-LLs and AmB-LLs, was detected in association with *C. albicans* hyphae in  
137 approximately 20%, 80%, and 5% of the infection centers, respectively (**Fig. 2A, 2B,**  
138 **2C**), albeit, the amounts of AmB-LLs observed were often at the limit of our detection.  
139 We quantified the red fluorescent area of liposome binding within and surrounding  
140 infection centers, in images wherein liposomes were detected. A scatter bar plot (**Fig.**  
141 **2D**) shows that respectively, DEC1-AmB-LLs and DEC2-AmB-LLs were 24-fold  
142 (P=0.027) and 56-fold (P=0.00015) more strongly associated with infection centers than  
143 AmB-LLs. This analysis gives only a semiquantitative assessment of binding, because it  
144 does not account for the differing frequency of finding infection centers with the three  
145 different types of liposomes. Replicate images of liposome binding are shown in  
146 **Supplemental Fig. SF2.**

147 **DectiSomes targeting of AmB enhanced the reduction of fungal burden in**  
148 **kidneys.** Neutropenic mice infected with  $7.5 \times 10^6$  *C. albicans* yeast cells and treated  
149 once 3 hr PI with either AmB-LLs, DEC1-AmB-LLs or DEC2-AmB-LLs delivering 0.2  
150 mg/kg AmB diluted into phosphate buffered saline (PBS) or with the same amount of  
151 PBS alone (Buffer control). On D1, 24 hr PI, the mice were sacrificed and their kidneys  
152 excised, homogenized, and assayed for fungal burden. In various previous reports on  
153 neutropenic mouse models of candidiasis infected with  $10^6$  *C. albicans* or  $10^7$  *C.*  
154 *glabrata* cells, a single dose of 1.0 to 20 mg /kg AmB delivered intravenously a few  
155 hours PI as micellar AmB-DOC or liposomal AmB preparations produced 3- to 10,000-  
156 fold reductions in the kidney fungal burden relative to control mice (33-35). In our mouse  
157 model AmB-LLs delivering 0.2 mg/kg AmB provided only marginal often insignificant



158 reductions in fungal burden relative to PBS treated mice ( $P=0.035$  to  $0.44$ , **Fig. 3**).  
159 However, mice treated with DEC1-AmB-LLs delivering  $0.2$  mg/kg AmB showed a  $4.5$ -  
160 fold reduction in colony forming units (CFUs) relative to AmB-LL treated mice ( $P=0.013$ ,  
161 **Fig. 3A**). Assays of the Relative Quantity of *C. albicans* rDNA ITS gene copies on DNA  
162 prepared from parallel samples of homogenized kidney tissue from the same mice (**Fig.**  
163 **3B**) revealed DEC1-AmB-LL treated mice had a  $6.2$ -fold greater reduction in fungal  
164 burden in the lungs than AmB-LL treated mice ( $P=4.2 \times 10^{-5}$ ), supporting the CFU  
165 results.

166 Mice treated with DEC2-AmB-LLs delivering  $0.2$  mg/kg AmB showed a  $7.2$ -fold  
167 reduction in the kidney fungal burden relative to AmB-LLs based on CFUs ( $P=9.6 \times 10^{-4}$ ,  
168 **Fig. 3C**) and a  $12$ -fold reduction based on qPCR amplified rDNA ITS ( $P=2.2 \times 10^{-5}$ , **Fig.**  
169 **3D**).

170 **DectiSomes targeting AFG reduced the fungal burden.** AFG is a first line  
171 antifungal used to treat candidiasis, with daily patient doses of  $1$  to  $4$  mg/kg continued  
172 for several weeks (36, 37). We wished to determine if Dectin targeting might improve  
173 the performance of AFG and employed Dectin-2, to test this idea. In published studies  
174 using neutropenic mouse models of candidiasis a dose of  $4$  to  $25$  mg/kg AFG produces  
175 at least a  $10$ -fold drop in fungal burden of in the kidneys within  $24$  to  $48$  hr (32, 38). A  
176 recent study prepared AFG-LLs loaded with  $5.2$  moles percent AFG relative to moles of  
177 liposomal lipid (39). In their wax moth model of candidiasis, the prophylactic  
178 administration of AFG-LLs delivering  $2.6$  mg/kg AFG significantly improved insect  
179 survival relative to an equivalent prophylactic dose of free AFG (39). We prepared AFG-  
180 LLs with  $6.2$  moles percent AFG (**Supplemental Table ST1**) and coated some with

181 Dectin-2 to make DEC2-AFG-LLs. Neutropenic mice were infected intravenously with  
182  $7.5 \times 10^6$  cells and at 3 hr PI given an intravenous dose of DEC2-AFG-LLs or AFG-LLs  
183 delivering 0.6 mg/kg AFG or liposome dilution buffer. Fungal burden in the kidneys was  
184 assayed 24 hr PI. Based on CFUs and qPCR, respectively, mice treated DEC2-AFG-  
185 LLs had a significant 9.8-fold ( $P = 7.8 \times 10^{-5}$ ) and 7.4-fold ( $P = 4.6 \times 10^{-6}$ ) reduction in  
186 kidney fungal burden relative to those treated with untargeted AFG-LLs (**Fig. 3E, 3F**).

187 **The performance of AmBisome relative AmB-LLs.** We wished to compare the  
188 performance of un-pegylated commercial AmBisome to our pegylated AmB-LLs and  
189 also to determine to what extent Dectin targeting improved the performance of  
190 AmBisome. In the neutropenic mouse model of candidiasis, we found that AmB-LLs  
191 delivering 2 mg/kg AmB reduced fungal burden in the kidneys 6.5-fold more than  
192 AmBisome delivering the same amount of AmB ( $P = 4.2 \times 10^{-6}$ , **Fig. 4A**). We prepared  
193 Dectin-1 and Dectin-2 coated AmBisome. Dectin-1 and Dectin-2 targeted AmBisome  
194 bound to *C. albicans* hyphae with similar specificity (**Fig. 4C-4E**) and efficiency (**Fig. 4F**)  
195 as Dectin targeted AmB-LLs (**Fig. 1**). When delivering 0.2 mg/kg AmB, DEC2-  
196 AmBisome reduced the kidney fungal burden 6.1-fold more than untargeted AmBisome  
197 ( $P = 0.0125$ , **Fig. 4B**).

198 **DectiSomes increased mouse survival.** Neutropenic mice were given an  
199 intravenous inoculum of  $0.5 \times 10^6$  *C. albicans* yeast cells, three intravenous treatments  
200 with DEC1-AmB-LLs or DEC2-AmB-LL or AmB-LLs delivering 0.2 mg AmB/kg or buffer  
201 (Control), 3 hr PI (D0), 24 hr PI (D1), and 48 hr PI (D2) (**Supplemental Fig. S1B**).  
202 Survival was monitored for 10 days (D10) PI as shown in **Fig. 5** (31, 40, 41). All buffer-  
203 treated control mice and a few of the liposome treated mice showed reduced grooming

204 by D3 PI. **Fig. 5A** presents a survival curve comparing DEC1-AmB-LLs to AmB-LLs.  
205 Forty two percent of the DEC1-AmB-LL treated mice survived to D10 as compared to  
206 16.6% of the AmB-LL treated mice, a 2.5-fold difference in the % survival. Control mice  
207 had an average survival time of 4.6 days. DEC1-AmB-LL treatment increased the  
208 average survival time to 8.0 days as compared to 5.7 days for AmB-LL treated mice  
209 (P=0.035). **Fig. 5B** examines the survival of mice treated with DEC2-AmB-LLs. Sixty six  
210 percent of the DEC2-AmB-LL mice survived to D10 as compared to 8.3% of the AmB-  
211 LL mice, an 8.3-fold difference in the % survival. Control mice had an average survival  
212 time of 4.2 days, AmB-LL mice 5.6 days, and DEC2-AmB-LL mice 8.7 days, based on  
213 estimating survival time to D10. DEC2-AmB-LL treatment significantly increased the  
214 average days of survival relative to AmB-LL treatment (P=0.0006). In summary, when  
215 mice with invasive candidiasis are treated with Dectin-1 or Dectin-2 targeted  
216 DectiSomes delivering 0.2 mg/kg AmB they both showed significantly improved mouse  
217 survival relative to AmB-LL treatment. Dectin-2 appeared superior to Dectin-1 in  
218 targeting liposomal AmB.

219

## 220 **DISCUSSION**

221 We showed that the AmB-LLs employed herein out performed commercial  
222 AmBisome at reducing the burden of *C. albicans* cells in the kidneys. Our AmB-LL are  
223 pegylated stealth liposomes. Pegylation protects liposomes from opsonization and  
224 phagocytosis, which significantly extends the half-life of packaged drug (42-45). Five  
225 moles percent of the liposomal lipids in the membrane of AmB-LLs are the lipid, DSPE  
226 (distearoyl-sn-glycero-3-phosphoethanolamine) coupled to poly-ethylene glycol (PEG).

227 DSPE inserts in the liposome membrane and presents PEG on the liposome surface  
228 (27). AmBisome was first patented and introduced to the clinic before the benefits  
229 pegylation were described. Because of their pegylation, we anticipated that AmB-LLs  
230 might out-perform AmBisome. However, while they share 11 moles percent AmB, AmB-  
231 LLs and AmBisome also have different ratios of different anionic lipids and cholesterol.  
232 Hence, because of these compositional differences, we cannot conclude  
233 unambiguously that pegylation is the reason that we observed superior antifungal  
234 activity of AmB-LLs over AmBisome. Yet, our results support this concept.

235       DEC1-AmB-LLs and DEC2-AmB-LLs both bound to the exopolysaccharide matrix  
236 associated with in vitro grown *C. albicans* hyphae and their binding efficiency was  
237 indistinguishable. Yet, qualitatively the location of their binding in the matrix was distinct,  
238 with DEC2-AmB-LLs binding to exopolysaccharide that was more closely and uniformly  
239 associated with hyphae than DEC1-AmB-LLs. DectiSomes delivered intravenously  
240 efficiently penetrated into the kidneys of infected mice. Modest amounts of DEC1-AmB-  
241 LLs and DEC2-AmB-LLs were observed in association with infection centers, while  
242 AmB-LLs were barely detected. These data suggest that once they are bound to their  
243 glycan ligands, DectiSomes remained in place, but being unbound AmB-LLs must have  
244 been flushed out of the kidneys. However, there was a wide variation in the amount of  
245 both DectiSomes measured in individual infection centers as revealed by the wide  
246 spread of data in scatter bar plots. DectiSomes may not penetrate equivalently into all  
247 parts of the infected kidney or the glycan ligands for binding may not be equivalently  
248 expressed in all infection centers. Both types of DectiSomes appeared to be associated  
249 with hyphae, but not bound directly to them, consistent with their binding to oligoglucans

250 and oligomannans in the associated fungal exopolysaccharide. DEC2-AmB-LLs bound  
251 significantly more efficiently to infection centers than DEC1-AmB-LLs. These results  
252 suggested the possibility that Dectin-2 targeted AmB-loaded liposomes would likely out-  
253 perform Dectin-1 targeted liposomes when their antifungal activity was tested in this  
254 mouse model of candidiasis.

255 Dectin-1 and Dectin-2 targeted DectiSomes delivering 0.2 mg/kg provided  
256 approximately a 9- to 19-fold reductions in kidney fungal burden relative to the buffer  
257 control and a 5- to 12-fold reduction relative to AmB-LL treated mice. DEC2-AmB-LLs  
258 appeared to be slightly superior to DEC1-AmB-LLs at reducing fungal burden relative to  
259 AmB-LLs. In mouse survival studies both Dectin-1 and Dectin-2 targeted DectiSomes  
260 delivering 0.2 mg/kg AmB improved mouse survival relative to untargeted AmB-LLs. But  
261 again DEC2-AmB-LLs appeared superior to DEC1-AmB-LLs, wherein DEC2-AmB-LLs  
262 showed relative increases the average days of survival and the percent of surviving  
263 mice.

264 Dectin-2 targeting of liposomal AFG (i.e., DEC2-AFG-LLs) provided a several fold  
265 increase in antifungal efficacy over untargeted AFG-LLs at reducing fungal burden.  
266 Targeting allowed a single low dose of AFG, 0.6 mg/kg, to be highly effective, a dose at  
267 which untargeted liposomal AFG-LLs was not effective. Although both AmB and AFG  
268 are amphiphobic allowing them to be intercalated into liposomal membranes, the two  
269 drugs are distinct in structure and antifungal mechanism. The polyene AmB damages  
270 the fungal membrane and osmotic integrity, while the echinocandin AFG inhibits beta-  
271 glucan synthase and ultimately oligoglucan synthesis in the cell wall and  
272 exopolysaccharide matrix. AmB is fungicidal and AFG is fungistatic. Showing improved

273 efficacy for targeted AFG is important step forward, because it begins to generalize  
274 DectiSome targeting strategies, paving the way to improve the performance of a wide  
275 variety of other existing polyene and echinocandin drugs, other classes of antifungal  
276 drugs such as the azoles and antimetabolites, and yet to be clinically approved new  
277 drugs. Furthermore, Dectin-2 targeting improved the effectiveness AmBisome,  
278 suggesting that DectiSome targeting should improve the antimicrobial activity of  
279 nanoparticles with diverse chemical compositions, not just AmB-LLs.

280 Dectin-1 and Dectin-2 are both C-type lectin pathogen receptors that respond to  
281 infections by *Candida spp.* and signal the immune system of an ongoing infection.  
282 Dectin-1 is expressed primarily by neutrophils, macrophages and dendritic cells, while  
283 Dectin-2 is primarily expressed by dendritic cells. Dectin-2 appears to be the primary  
284 receptor by which Bone Marrow-derived Dendritic Cells (BMDC) signal an oligomannan  
285 dependent innate immune response to *C. albicans* yeast cells (46). BMDCs from  
286 *Clec4n<sup>-</sup>/Clec4n<sup>-</sup>* (Dectin-2 KO) mice show a hundred-fold reduction in the induction of  
287 inflammatory cytokines, such as IL-6 or TNF-alpha, when exposed to *C. albicans* cell-  
288 derived mannans, as compared to WT BMDCs (46). The importance and role of Dectin-  
289 1 in the response to exposure to *Candida spp.* is less clear, and appears to be less  
290 significant. There is substantial evidence that the *Candida spp.* beta-glucan ligands are  
291 heavily masked from binding either by Dectin-1 and/or anti-beta-glucan antibodies and  
292 significantly protected from the host innate immune response (47-51). For example,  
293 when BDMCs derived from *Clec7a<sup>-</sup>/Clec7a<sup>-</sup>* mice (*Dectin-1* knockout KO) are exposed  
294 to *C. albicans* or other *Candida spp.* yeast cells, their induction of inflammatory  
295 cytokines, such as IL-6 or TNF-alpha, is only reduced by 20 to 50% relative to wild type

296 BMDCs (52). Yet, Dectin-1 KO mice infected with *C. albicans* are significantly more  
297 likely to die than WT mice, suggesting Dectin-1 does contribute positively to preventing  
298 infection. By contrast, the survival of these Dectin-1 KO mice is not reduced, when  
299 exposed to other common pathogenic *Candida spp.* such as *C. glabrata* or *C. tropicalis*,  
300 presumably due to the masking of their oligoglucans (52).

301 Therefore, based on the response of these two Dectins to *Candida spp.* infections  
302 and the suggestion that oligomannans were masked, we were confident at the start of  
303 this project about the potential of Dectin-2 targeting, but doubtful about the benefits of  
304 Dectin-1 targeting. We were encouraged to proceed with in vivo testing of Dectin-1  
305 targeted DectiSomes by our strong in vitro data and modest in vivo kidney data showing  
306 DEC1-AmB-LL bound to exopolysaccharide associated with *C. albicans*. Both the partial  
307 masking of oligoglucans in vivo and the more distal association of DEC1-AmB-LLs with  
308 hyphae may explain their slightly lower effectiveness at reducing fungal burden and  
309 improving mouse survival as compared to DEC2-AmB-LLs.

310 *Candida spp.* form biofilms, which sequester antifungal agents and physically block  
311 access to fungal cell surfaces, thus helping them evade the host immune system and  
312 increase antifungal drug resistance (53-55). Even immunocompetent individuals may  
313 have persistent *Candida* infections, when biofilms form on implanted medical devices  
314 (53, 56, 57). AmB-LLs are significantly more effective at killing *C. albicans* residing in  
315 biofilms than either detergent solubilized micellar AmB-DOC or micellar fluconazole  
316 (58). Liposomal AmB-LLs also penetrate more efficiently into various organs (59-61),  
317 and the fungal cell wall (62), and show reduced organ toxicity and less infusion toxicity  
318 at higher AmB doses when compared to detergent solubilized AmB (23-25, 63, 64).



319 Because of the effectiveness of liposomal formulations at both organ and biofilm  
320 penetration, new studies on therapeutics to treat candidiasis, often include variously  
321 prepared AmB-LLs or AmBisome as a standard for comparison (18, 40, 65-67), as we  
322 have done herein. Our results suggest that in neutropenic mice, DectiSomes targeted to  
323 either the oligoglucan or oligomannan components of the *C. albicans* exopolysaccharide  
324 matrix enhance the performance of AmB-LLs. Future studies need to focus specifically  
325 on the efficacy of DectiSomes against various *C. albicans* biofilms.

326 **Conclusions.** Dectin-1 or Dectin-2 targeting of liposomal AmB to *C. albicans*  
327 glycans significantly improved the performance of AmB, over untargeted AmB-LLs.  
328 Similarly, Dectin-2 targeting improved the performance of commercial AmBisome and of  
329 liposomal AFG. These data suggest targeting may improve the performance of a wide  
330 variety of drugs packaged in diversely structured nanoparticles. Oligoglucans and  
331 oligomannans, the respective glycan targets of Dectin-1 and Dectin-2, are ubiquitous  
332 components of the cell wall and biofilms of most pathogenic fungi suggesting there is  
333 pan-antifungal potential for DectiSome technology. A previous study showed that  
334 oropharyngeal delivery of Dectin-2 targeted DectiSomes to neutropenic mice with  
335 pulmonary aspergillosis was more effective at treating the infection than AmB-LLs (30).  
336 Herein, we show that DectiSomes delivered intravenously were effective at controlling  
337 an invasive *Candida* infection and penetrated into a host organ, the kidneys. Hence, it  
338 appears that DectiSomes have considerable potential as pan-antifungal agents whether  
339 delivered directly to the lungs or delivered intravenously. The improved performance of  
340 DectiSomes needs to be tested in a variety of other mouse models of fungal diseases,



341 such as cryptococcal meningitis and pulmonary mucormycosis and superficial infections  
342 such as keratitis, and tested with antifungal drugs other than AmB and AFG.

343

## 344 **MATERIALS AND METHODS**

345 **Strains and culture.** *C. albicans* strain SKY43, expresses GFP under control of  
346 the ADH1 promoter (68) and was derived from a human isolate (SC5314, ATCC MYA-  
347 2876) deleted for URA3 (strain CA14,  $\Delta$ ura3::imm434/ $\Delta$ ura3::434)(69). *C. albicans*  
348 yeast cells were grown to early log phase in YPD, washed once into fresh YPD,  
349 aliquoted, snap frozen in liquid nitrogen, and stored frozen at -80°C in 25% glycerol.  
350 Cells were thawed once or twice just before use, vortexed, and diluted to the desired  
351 cell concentration in sterile saline. The viability of the thawed cultures was close to 99%.  
352 Mice were infected via the retroorbital injection of 100  $\mu$ L of saline containing  $7.0 \times 10^6$   
353 or  $0.5 \times 10^6$  yeast cells (67) (**Supplemental Fig. S2**).

354 Seven- to eight-week-old outbred female CD1 (CD-1 IGS) Swiss mice (27 g to 30 g  
355 ea.) were obtained from Charles River Labs. Mice were maintained in UGA's Animal  
356 Care Facility. All mouse protocols met guidelines for the ethical treatment of non-human  
357 animals outlined by the U.S. Federal government (70) and UGA's Institutional Animal  
358 Care and Use Committee (AUP #A2019 08-031-A1).

359 **In vitro binding studies.** For in vitro binding studies 10,000 cells/mL *C. albicans*  
360 yeast cells were plated in 500  $\mu$ L of RPMI 1640 media lacking red dye at pH 7.5 in each  
361 well of a 24 well microtiter plate and grown for 12 hr to achieve approximately 50%  
362 coverage with hyphae. Cells were washed once with PBS, fixed in 4% formalin for 45  
363 min, and washed 3x with PBS. Cells were blocked with PBS + 5.0% BSA for 30 min,

364 treated with rhodamine red fluorescent liposomes in this blocking buffer, stained with 25  
365  $\mu$ M CW (Blankophor BBH SV-2560; Bayer, Corp.) for 60 min, and washed 3x with the  
366 same buffer. Images were taken on an EVOS imaging system using the DAPI and RFP  
367 fluorescent channels and the red fluorescence area within un-enhanced images was  
368 quantified in ImageJ (26). The accompanying images presented were enhanced  
369 equivalently in the blue and red channels.

370 **Neutropenic model of disseminated candidiasis.** Immunosuppressed  
371 neutropenic mice were obtained by treatment with both the antimetabolite  
372 cyclophosphamide (CP, Cayman #13849) and the synthetic steroid triamcinolone (TC,  
373 Millipore Sigma # T6376) following the schedules shown in **Supplemental Fig. SF1**.  
374 Five or six mice were in each treatment group and in some cases two replicate  
375 experiments. CP and TC stocks, dilutions, and injection methods were described  
376 recently (30).

377 Infected buffer control animals not receiving antifungal therapy first showed a  
378 ruffled coat due to reduced grooming, then decreased movement, followed by abnormal  
379 posture, trembling and severe lethargy. The onset of symptoms occurred much more  
380 rapidly in animals receiving the larger fungal inoculum size and was reduced in animals  
381 receiving liposomal AmB. Once mice showed severe lethargy and were moribund, they  
382 were sacrificed by cervical dislocation following anesthesia with isoflurane (Animal Use  
383 Protocol, A2019 08-031-A1).

384 **Liposomes and drugs.** We constructed AmB-LLs, DEC1-AmB-LLs, DEC2-AmB-  
385 LLs, and BSA-AmB-LLs as described previously (26, 27). Dectisomes contain 1 mole  
386 percent dectin relative to moles of liposomal lipid. Similar to AmBisome they contain 11

387 moles percent AmB, but our liposomes also contain two moles percent Rhodamine B-  
388 DHPE for visualization.

389 AFG-LLs were prepared in 273  $\mu$ L batches using a remote loading method  
390 analogous to that which we used to prepare AmB-LLs (26, 27). To quantify AFG loading  
391 into liposomes, we determined that AFG had an extinction coefficient (17.4 O.D.  
392 /mg/mL) at A340 in DMSO, using a dilution series and a Bio-Tek Synergy HT microtiter  
393 plate reader (**Supplemental Fig. SF3**). Ten moles percent AFG (1.7 mg, 1.5  $\mu$ moles)  
394 relative to moles of liposomal lipid was dissolved in 13  $\mu$ L DMSO and added to 15  
395  $\mu$ moles liposomal lipid (260  $\mu$ L of 100 nanometer diameter Formumax liposomes  
396 (F10203, Plain)). AFG and liposomes were incubated for 72 hours at 37°C with gentle  
397 tumbling. The AFG-LLs were spun at room temperature for 2 min at 1,000 x g to  
398 sediment the remaining insoluble AFG that was not loaded into liposomes and did not  
399 remain soluble between liposomes. We had predetermined that the solubility of AFG in  
400 our liposome loading buffer (10% sucrose, 20 mM HEPES, pH 7.0-7.5, and 5% DMSO)  
401 to be 0.31 mg/273  $\mu$ L). The AFG precipitate (i.e., that not loaded in liposomes) was then  
402 dissolved in DMSO and quantified at A340. By subtraction of the insoluble AFG and the  
403 predetermined solubility in loading buffer, we calculated that the AFG-LLs contained 6.2  
404 moles percent AFG. One mole percent Dectin-2 modified with a lipid carrier, DEC2-  
405 PEG-DSPE, was then added to the AFG-LLs to make DEC2-AFG-LLs (26, 27). See  
406 **Supplemental Table ST1**.

407 **Liposome binding to infection centers in the kidneys.** Hand sections of freshly  
408 harvested kidney were cut and stained for fungal chitin with calcofluor white  
409 (Blankophor BBH SV-2560; Bayer, Corp.) as previously described (30). The blue

410 fluorescent chitin ex360/em470 and rhodamine tagged liposomes ex560/em645 were  
411 examined by epifluorescence microscopy using a LEICA DM6000 compound  
412 fluorescent microscope at 10X magnification as described previously for liposome  
413 binding to lung tissue (30). The area of red fluorescent liposome binding in the original  
414 TIFF images was quantified in ImageJ as described previously (30). For photographic  
415 presentation of binding the blue CW and red liposome channels of the original Tiff  
416 images were equivalently enhanced in Photoshop (version 20.0.8) to aid in visualizing  
417 fungal cells and liposomes, respectively, and then converted to JPEG images for  
418 presentation.

419 **Fungal burden estimates.** Fungal burden was estimated in excised kidney pairs  
420 from infected animals on D1 PI by assaying both the number of CFUs and the amount  
421 of *C. albicans* ribosomal rDNA intergenic transcribed spacer (ITS) estimated by  
422 quantitative real time PCR (qPCR). Kidney pairs were weighed and minced into  
423 hundreds of approximately 1 mm<sup>3</sup> pieces, the pieces mixed to account for the uneven  
424 distribution of infection centers, and aliquoted into 25 mg samples. *CFUs*. 25 mg of the  
425 minced kidney tissue was homogenized for 60 seconds in 200 uL of PBS using a hand-  
426 held battery powered homogenizer (Kimble, cat#749540-0000) and blue plastic pestle  
427 (Kimble Cat#749521-1500). The homogenate was spread evenly by shaking with sterile  
428 glass beads on 5 mm thick YPD (yeast extract, peptone, and dextrose) agar plates  
429 containing 100 ug/mL each of Kanamycin and Ampicillin. After a 11 hr incubation at  
430 37°C, the microcolonies of 5 to 300 microns in diameter were counted on an EVOS  
431 imaging system (AMG FI) at 4X magnification. An example of the images of  
432 microcolonies used to make CFU estimates is shown in **Supplemental Fig. SF4**. The

433 number of CFUs was corrected for the area of the entire plate relative to each  
434 microscopic field and the weight of each kidney pair. The numbers of colonies were  
435 often so low for the DEC1-AmB-LL and DEC2-AmB-LL treated samples that 20 or more  
436 fields had to be counted on each plate to record a statistically significant number of  
437 colonies. *qPCR*. DNA was extracted from 25 mg parallel samples from kidney  
438 homogenates using Qiagen's DNeasy® Blood & Tissue Kit (#69504) modified as we  
439 described previously for *A. fumigatus* infected lung tissue (30). We typically obtained 25  
440 TI 40 ug of total DNA from 25 mg of kidney tissue. Quantitative real-time PCR (qPCR)  
441 was used to estimate the amount of *C. albicans* rDNA ITS sequence in 100 ng samples  
442 of infected kidney DNA using the conditions described previously (30). Several new  
443 PCR primer pairs designed to amplify the ITS downstream of 18S rDNA of *C. albicans*  
444 were designed and tested against purified *C. albicans* DNA. The optimal primer pair  
445 giving the lowest cycle threshold value (Ct) and a single dissociation peak had the  
446 following sequences (forward primer Ca18S-4S, 5'-  
447 TAGGTGAACCTGCGGAAGGATCATT and reverse primer Ca18S-2A 5'-  
448 TTGTAAGTTTAGACCTCTGGCGGCA). This primer pair gave no detectable product  
449 even after 45 cycles of PCR, when uninfected kidney tissue DNA was examined. The  
450 Relative Quantity (RQ) of *C. albicans* rDNA ITS was determined by normalizing all Ct  
451 values to the lowest Ct value determined for infected control kidneys using the dCt  
452 method (71).

453 **Data management.** Raw quantitative data were managed in Excel v16.16.27.  
454 Scatter bar plots, survival plots, and XY plots were prepared in GraphPad Prism v.9.0.0.  
455 Because the data for liposome binding, fungal burden estimates and days of survival

456 were reasonably normally distributed, the Student's two tailed t-Test was used to  
457 estimate P values (72).

458

## 459 **ACKNOWLEDGMENTS**

460 We wish to thank Kristine Wilcox and the other staff members of UGA's University  
461 Research Animal Facilities for the conscientious care of our mice.

462

## 463 **FUNDING**

464 S.A., and R.B.M. received funding from the University of Georgia Research  
465 Foundation, Inc. (UGARF), R.B.M. and Z.A.L. received funding from the National  
466 Institutes of Health, NIAID (grants R21AI144498 and R21AI148890), and RBM from the  
467 Georgia Research Alliance Ventures, and T.P. and X.L. received funding from NIAID  
468 (R21AI150641) and the University of Georgia. These funding agencies are not  
469 responsible for the content of this article.

470

## 471 **CONFLICTS OF INTEREST**

472 The authors have submitted a patent on this technology (73).



473 **Figures**

474 **Fig. 1. DEC1-AmB-LLs and DEC2-AmB-LLs bound specifically to in vitro grown *C.***  
475 ***albicans* hyphae.** *C. albicans* hyphae were stained with rhodamine tagged liposomes  
476 (A) DEC1-AmB-LLs and (B) DEC2-AmB-LLs, and (C) AmB-LLs. Binding by BSA coated  
477 BSA-AmB-LLs is not shown. A to C. Fungal cell chitin was stained with CW. The  
478 epifluorescence of chitin (blue) and liposomes (red) was photographed at 10X  
479 magnification. The Dectin and BSA protein concentration was 1 ug/100 uL PBS (1:100  
480 w/v), and AmB-LLs were diluted equivalently. Size bars represent 400 microns. D. A  
481 scatter bar plot compares the area of red fluorescent staining quantified from 10 images  
482 for each type of liposome. Standard errors and the fold differences in average area of  
483 staining and P values are indicated for comparisons of DectiSomes to AmB-LLs.

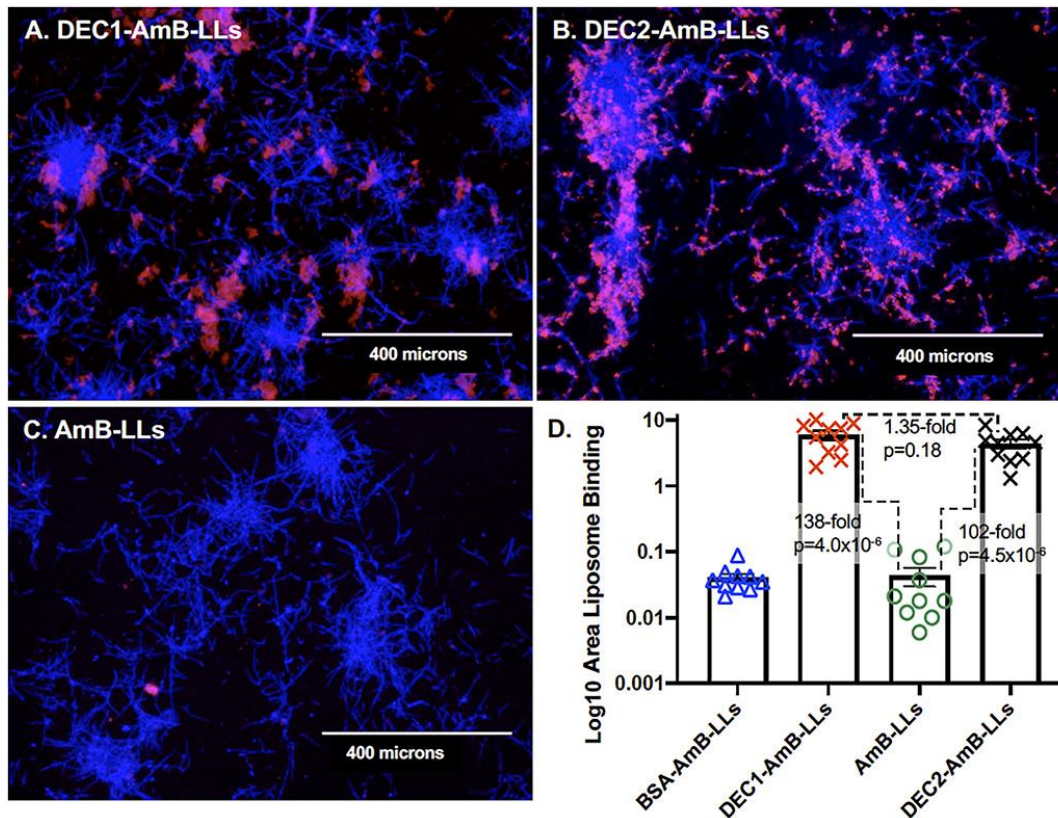

484

485

486 **Fig 2. DectiSomes delivered intravenously are concentrated in *C. albicans***  
487 **infection centers in the mouse kidney.** Immunosuppressed mice with invasive  
488 candidiasis were injected intravenously with red fluorescent liposomes. Thick sections  
489 of the kidneys were stained with CW. **A, B, C.** The blue fluorescence of chitin (shown in  
490 green) and the red fluorescence of rhodamine tagged liposomes were photographed by  
491 epifluorescence from the surface of the tissue sections at 10X magnification. **A.** AmB-  
492 LLs. **B.** DEC1-AmB-LLs. **C.** DEC2-AmB-LLs. **D.** A scatter bar plot compares the area of  
493 red liposome fluorescence quantified from 10 images of infection centers for each  
494 treatment. Fold differences in the average area of liposome staining and P values are  
495 indicated.

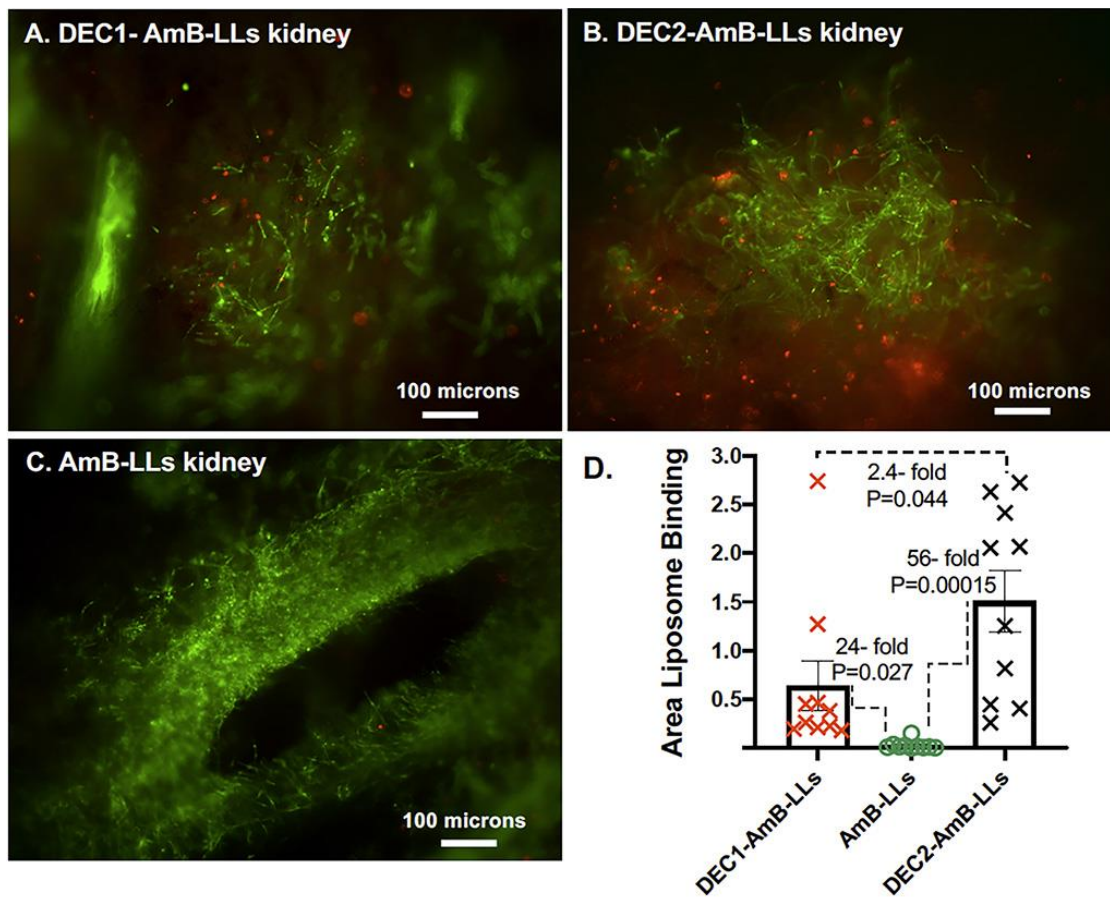

496

497



498 **Fig. 3. DectiSomes were more effective at reducing the burden of *C. albicans* in**  
 499 **the kidneys as compared to untargeted AmB-LLs.** Neutropenic mice infected with *C.*  
 500 *albicans* were treated with PBS (Buffer control) or various AmB loaded liposomes.  
 501 Scatter bar plots compare the fungal burden in the kidneys following treatment. **A. & B.**

502 DEC1-AmB-LLs or AmB-LLs  
 503 delivering 0.2 mg AmB/kg or PBS.

504 **C. & D.** DEC2-AmB-LLs or AmB-LLs  
 505 LLs delivering 0.2 mg AmB/kg or  
 506 PBS. **E. & F.** The performance of

507 targeted Anidulafungin loaded  
 508 liposomes. Fungal burden was

509 assayed in infected mice treated  
 510 with DEC2-AFG-LLs or AFG-LLs  
 511 delivering 0.6 mg AFG/kg or PBS.  
 512 CFUs or the Relative Quantity (RQ)

513 of *C. albicans* rDNA was  
 514 determined in kidney homogenates

515 from the same mice. Twelve mice  
 516 were included in each treatment

517 group. See treatment regimens  
 518 displayed in **Supplemental Fig.**

519 **S1A.**

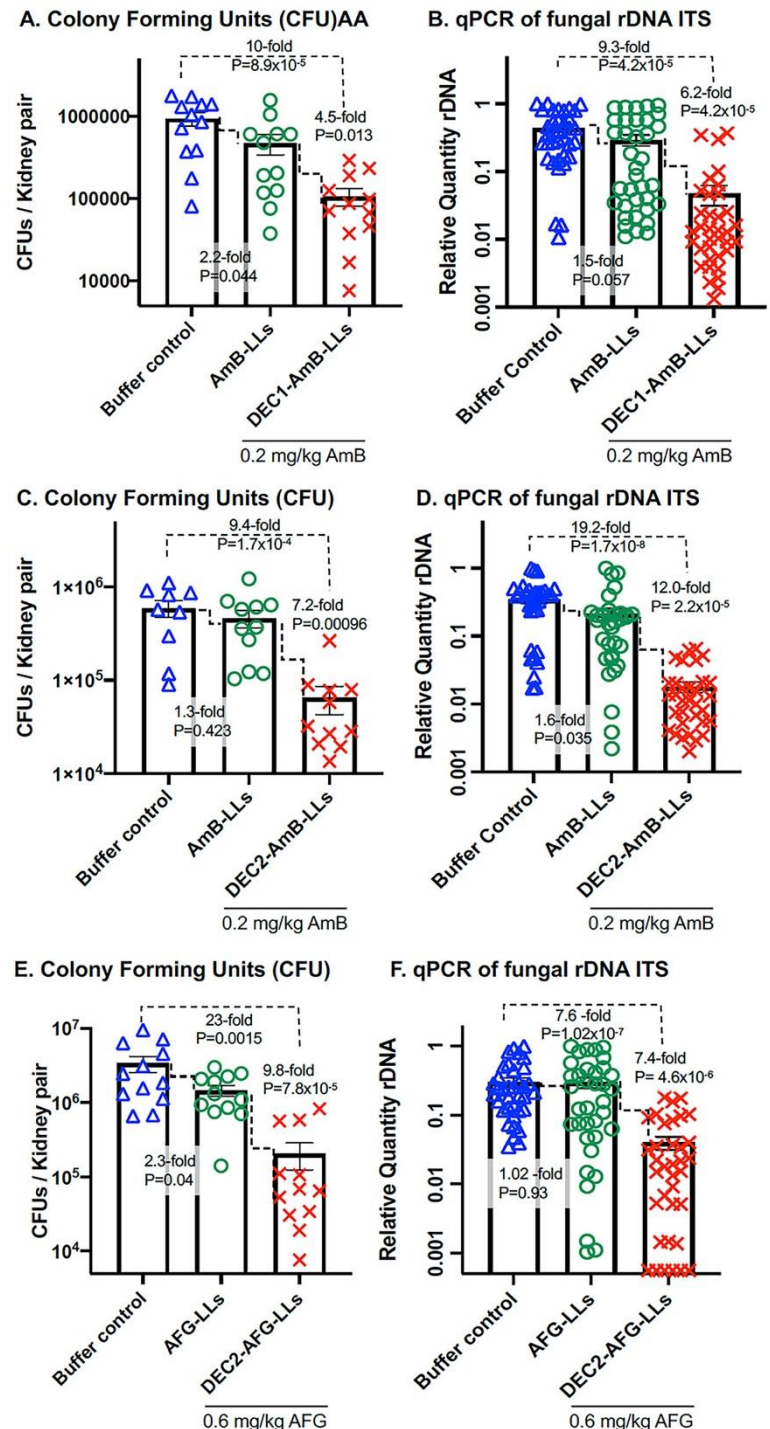

520 **Fig. 4. The relative performance of AmBisome. A & B.** The kidney fungal burden was  
 521 examined after neutropenic mice infected with *C. albicans* were treated with liposomes.  
 522 **A.** Mice were treated with AmBisome or the AmB-LLs delivering 2.0 mg AmB/kg or  
 523 PBS. **B.** Mice were treated with AmBisome and DEC2-AmBisome delivering 0.2 mg  
 524 AmB/kg or PBS. See mouse treatment regimens displayed in **Supplemental Fig. S1A.**  
 525 **C, D, E.** Fluorescent images showing the binding of Dectin targeted and untargeted  
 526 rhodamine B tagged AmBisome to in vitro grown *C. albicans*. Fungal chitin was stained  
 527 with CW. **F.**

528 Quantification of the  
 529 liposome binding was  
 530 estimated from multiple  
 531 images such as those in  
 532 C-E. Standard errors,  
 533 fold differences in the  
 534 average area of  
 535 liposome staining, and P  
 536 values are indicated.

537  
 538

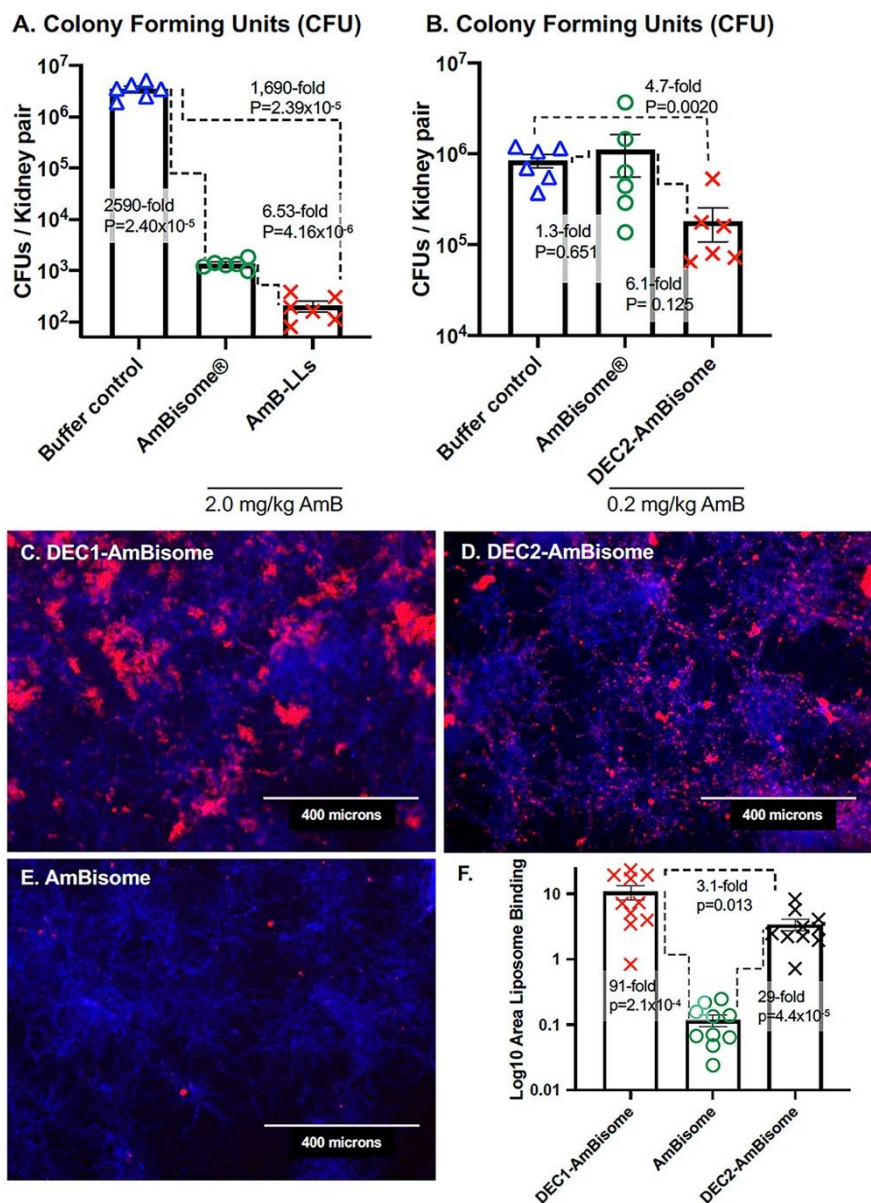

539 **Fig. 5. DectiSomes improved mouse survival relative to untargeted AmB-LLs.**  
540 Neutropenic mice infected with *C. albicans* were treated with DEC1-AmB-LLs (A),  
541 DEC2-AmB-LLs (B) and AmB-LLs delivering 0.2 mg AmB/kg diluted into PBS or with  
542 PBS (Control). Mouse survival was monitored for 10 days PI. Fold differences in the  
543 percent of surviving mice and P values comparing the days of survival 10 days PI are  
544 indicated for the critical comparison of DectiSomes to AmB-LLs. Twelve mice were  
545 included in each treatment group. See treatment regimen displayed in **Supplemental**  
546 **Fig. S1B.**

**A. DEC1-AmB-LLs (0.2 mg/kg)**

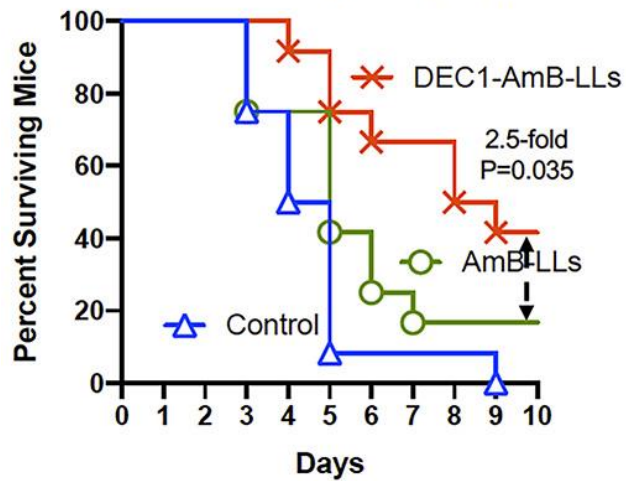

**B. DEC2-AmB-LLs (0.2 mg/kg)**

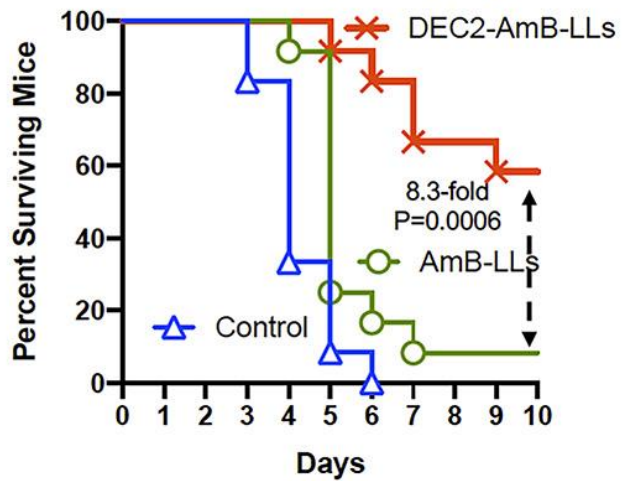

547

548

549 **Supplemental Tables and Figures.**

550

551 **Supplemental Table ST1. Chemical composition of Anidulafungin loaded**

552 **liposomes (AFG-LLs).**

| <b>Compound</b>                                                                                 | <b>µg in each preparation of liposomes</b> | <b>µg / µmole Mol. Wgt.</b> | <b>µmoles total</b> | <b>Moles percent relative to moles of liposomal lipid</b> |
|-------------------------------------------------------------------------------------------------|--------------------------------------------|-----------------------------|---------------------|-----------------------------------------------------------|
| DSPC (1,2-distearoyl-sn-glycero-3-phosphocholine)                                               | 6516.00                                    | 790.00                      | 8.25                | 50.00                                                     |
| cholesterol                                                                                     | 1591.00                                    | 387.00                      | 4.11                | 45.00                                                     |
| mPEG2000-DSPE                                                                                   | 2302.10                                    | 872.00                      | <u>2.64</u>         | <u>5.00</u>                                               |
| Total mmoles and moles percent liposomal lipid                                                  |                                            |                             | 15.00               | 100.00                                                    |
|                                                                                                 |                                            |                             |                     |                                                           |
| Anidulafungin (AFG)                                                                             | 1030.00                                    | 1140.00                     | 0.90                | 6.02                                                      |
| Lissamin Rhodamine B 1,2-Dihexadecanoyl-sn-Glycero-3-Phosphoethanolamine, Triethylammonium Salt | 400.00                                     | 1333.81                     | 0.30                | 2.00                                                      |

553

554



555 **Supplemental Fig. SF1. Treatment regimens used to assay liposome binding,**  
 556 **fungal burden and mouse survival- immunosuppression, infection, liposome**  
 557 **treatments and endpoints.** A neutropenic mouse model was used to ensure  
 558 reproducible infection by *C. albicans* yeast cells. **A.** The regimen used to assay binding  
 559 of DectiSomes to infection centers in the kidneys as compared to AmB-LLs and the  
 560 impact of DectiSomes on fungal burden as compared to untargeted liposomes or control  
 561 buffer. Liposome binding was assayed on Day 4 (D4) PI and fungal burden was  
 562 determined on D1 PI. **B.** Regimen used to assay mouse survival after treatment with  
 563 DEC1-AmB-LLs, DEC2-AmB-LLs, AmB-LLs or control buffer. The Day(s) (D) of  
 564 treatment are indicated before and after the day of infection (D0). CP,  
 565 cyclophosphamide. TC, triamcinolone. Survival was monitored until D10.

**A. Regimen for assaying liposome binding in the kidneys or fungal burden in the kidneys** 566

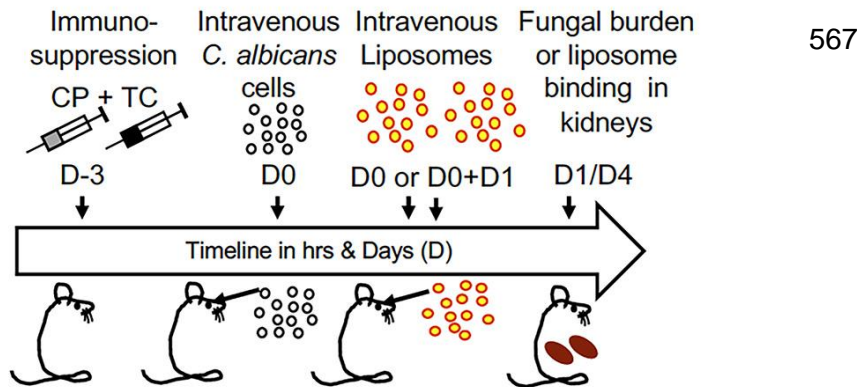

**B. Regimen for assaying the survival of mice with candidiasis**

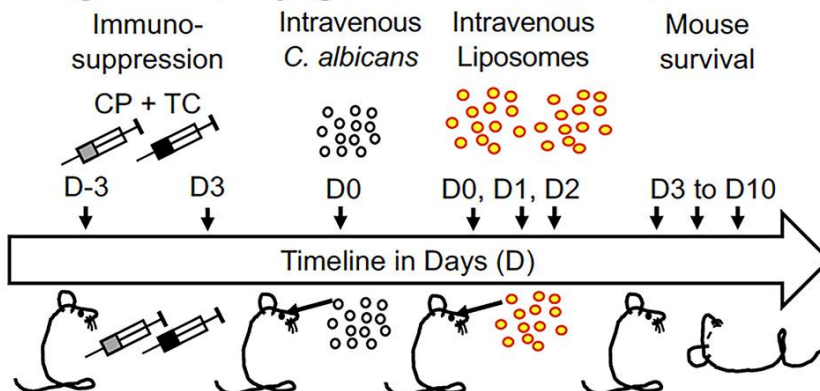

568 **Supplemental Fig. SF2. DectiSomes targeted by Dectin-1 or Dectin-2 and**  
569 **delivered intravenously are concentrated in *C. albicans* infection centers in the**  
570 **mouse kidney.** Replicate images for the experiment illustrated in **Fig. 2** showing the  
571 superior binding of DEC1-AmB-LLs and DEC2-AmB-LLs to *C. albicans* colonies in the  
572 kidneys relative to untargeted AmB-LLs.

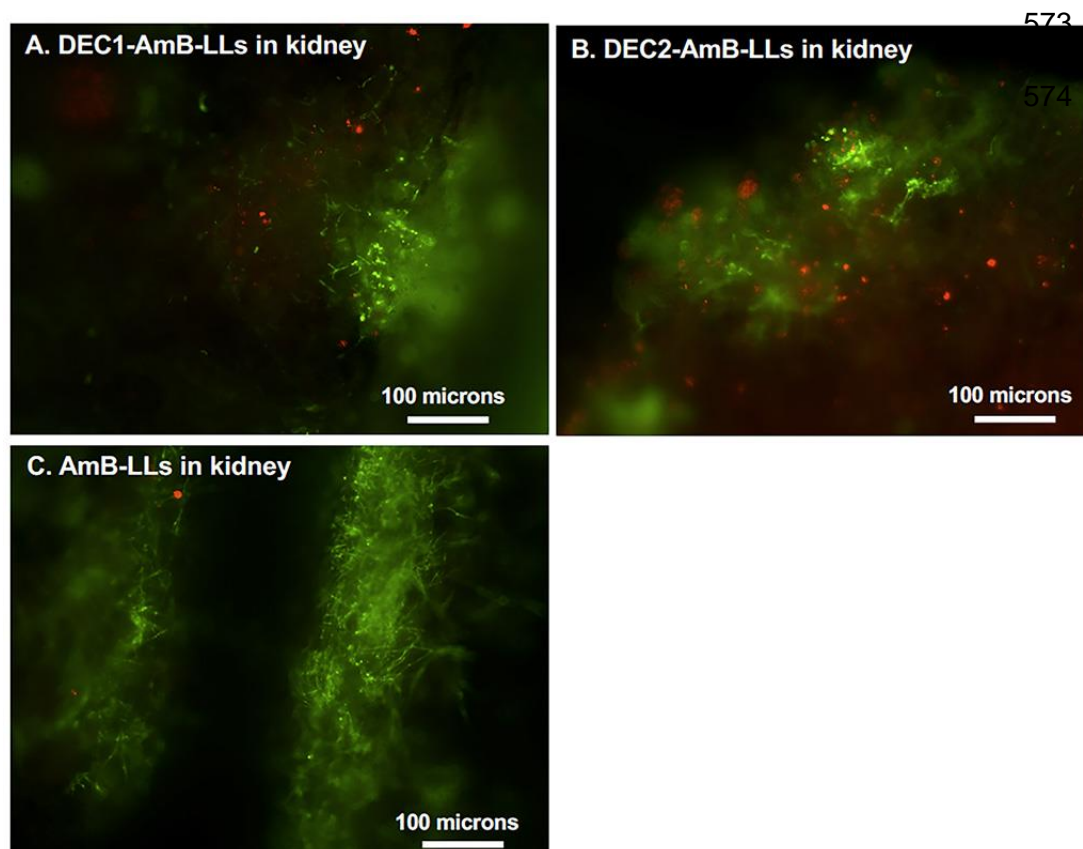

575 **Supplemental Fig. SF3. Experimental data used to quantify the moles percent of**

576 **AFG loaded into AFG-LLs.** Light scattering from liposomes prevents a direct

577 measurement of the UV absorbance of drugs loaded into liposomes. Hence, we

578 estimated the percent of AFG loaded into liposomes by the subtraction of that which

579 was not loaded into liposomes as we have done before to estimate the loading of AmB

580 (27). **A.** Standard curve plotting the absorbance of AFG at A340 in a dilution series in a

581 96 well microtiter plate vs the amount mg amount of AFG dissolved in 50 uL of DMSO.

582 When more than 0.12 mg of AFG were examined the A340 absorbance values were too

583 high to be read. **B.** When 1.7 mg of AFG was tumbled for 3 days in 273 uL of liposome

584 buffer, was 81.3% of the total remained insoluble. This was determined by taking the

585 insoluble AFG precipitate and dissolving it in 50 uL DMSO and reading A340 for a

586 dilution series. **C.** After incubating liposomes and 1.7 mg of AFG together in 273 uL the

587 insoluble AFG was spun down and assayed by in a dilution series in 50 uL DMSO. This

588 is the amount of AFG not taken up by liposomes and not soluble in the buffer

589 surrounding them. **D.** The amount of AFG that remained soluble in 273 uL of liposome

590 buffer was

591 estimated by

592 subtracting the

593 data in curve B

594 from that in A.

595

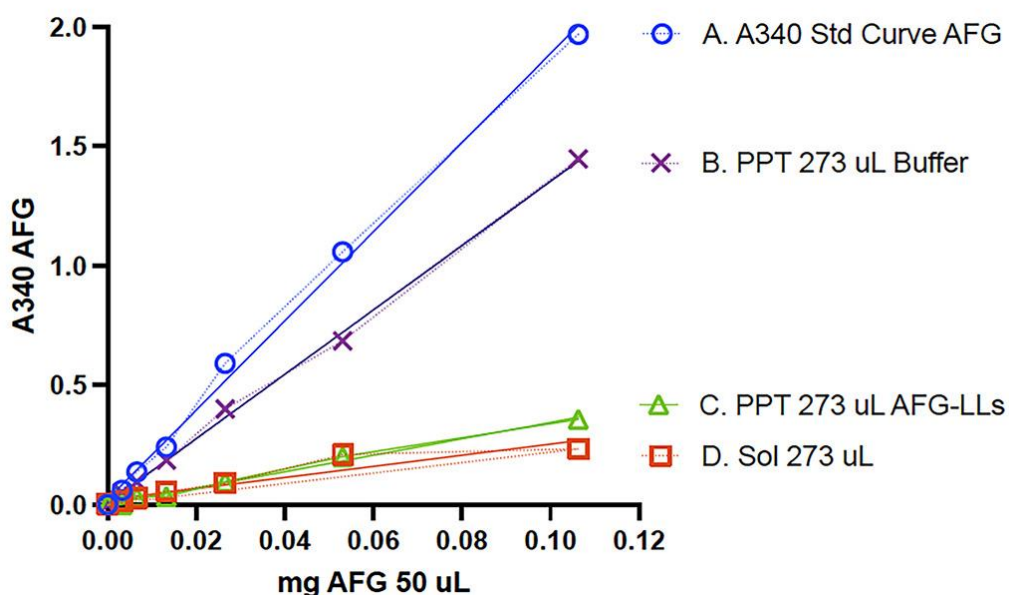

596 **Supplemental Fig. SF4. Assays of *C. albicans* microcolonies to determine fungal**  
597 **burden in the kidneys of neutropenic mice with candidiasis than AmB-LLs (an**  
598 **example experiment).** Aliquots of homogenized kidney tissue were diluted into PBS,  
599 plated on YPD agar, incubated 11 hr at 37°C, and microcolonies counted. **A.** A bar plot  
600 compare the average number of CFUs of *C. albicans* for mice treated once with DEC2-  
601 AmB-LLs or AmB-LLs delivering 0.2 mg/kg AmB or with liposome dilution buffer.  
602 Standard errors are indicated by a line and whisker. **B, C, & D.** Examples of the images  
603 used to make CFU estimates. Microcolonies ranging from 5 to 300 microns in diameter  
604 were counted from the bottom of agar petri plates on an EVOS imaging system at 4X  
605 magnification. The number of CFUs was corrected for the area of the entire plate  
606 relative to each microscopic field, the amount of homogenized kidney tissue plated, and  
607 the weight of each kidney pair. Six mice were in each treatment group in this example.

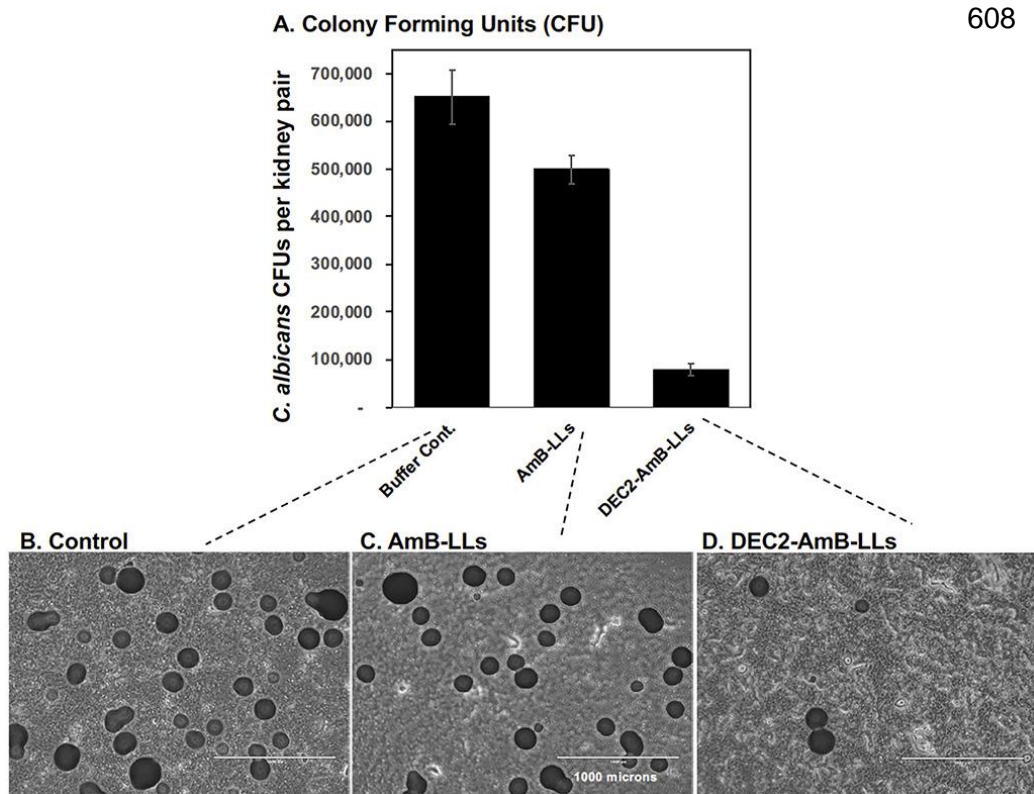



## 609 REFERENCES

610

611 1. CDC. 2019. Antibiotic / Antimicrobial Resistance (AR / AMR).

612 <https://www.cdc.gov/drugresistance/biggest-threats.html>.

613 2. Bongomin F, Gago S, Oladele RO, Denning DW. 2017. Global and Multi-National  
614 Prevalence of Fungal Diseases-Estimate Precision. *J Fungi (Basel)* 3:1-29.

615 <https://www.ncbi.nlm.nih.gov/pubmed/29371573>.

616 3. CDC. 2020. Candidiasis. <https://www.cdc.gov/fungal/diseases/candidiasis/index.html>.

617 4. Taylor P. 2020. Antifungal Drugs: Technologies and Global Markets. BCC Research  
618 LLC, Publishing B,

619 5. Stollo S, Lionakis MS, Adjemian J, Steiner CA, Prevots DR. 2016. Epidemiology of  
620 Hospitalizations Associated with Invasive Candidiasis, United States, 2002-2012(1).  
621 *Emerg Infect Dis* 23:7-13.

622 6. Eades CP, Armstrong-James DPH. 2019. Invasive fungal infections in the  
623 immunocompromised host: Mechanistic insights in an era of changing  
624 immunotherapeutics. *Medical Mycology* 57:S307-S317.

625 <https://doi.org/10.1093/mmy/myy136>.

626 7. Sims CR, Ostrosky-Zeichner L, Rex JH. 2005. Invasive candidiasis in  
627 immunocompromised hospitalized patients. *Arch Med Res* 36:660-71.

628 <https://www.ncbi.nlm.nih.gov/pubmed/16216647>.

629 8. Gahn B, Schub N, Repp R, Gramatzki M. 2007. Triple antifungal therapy for severe  
630 systemic candidiasis allowed performance of allogeneic stem cell transplantation. *Eur J*  
631 *Med Res* 12:337-40. <https://www.ncbi.nlm.nih.gov/pubmed/17933709>.

632 9. Marukutira T, Huprikar S, Azie N, Quan S-P, Meier-Kriesche H-U, Horn DL. 2014.

633 Clinical characteristics and outcomes in 303 HIV-infected patients with invasive fungal

- 634 infections: data from the Prospective Antifungal Therapy Alliance registry, a multicenter,  
635 observational study. HIV/AIDS (Auckland, NZ) 6:39-47.  
636 <https://pubmed.ncbi.nlm.nih.gov/24648769>  
637 <https://www.ncbi.nlm.nih.gov/pmc/articles/PMC3958502/>.
- 638 10. Anwar KP, Malik A, Subhan KH. 2012. Profile of candidiasis in HIV infected patients.  
639 Iranian journal of microbiology 4:204-209. <https://pubmed.ncbi.nlm.nih.gov/23205253>  
640 <https://www.ncbi.nlm.nih.gov/pmc/articles/PMC3507311/>.
- 641 11. Stone NR, Bicanic T, Salim R, Hope W. 2016. Liposomal Amphotericin B  
642 (AmBisome((R))): A Review of the Pharmacokinetics, Pharmacodynamics, Clinical  
643 Experience and Future Directions. Drugs 76:485-500.  
644 <https://www.ncbi.nlm.nih.gov/pubmed/26818726>.
- 645 12. Reboli AC, Rotstein C, Pappas PG, Chapman SW, Kett DH, Kumar D, Betts R, Wible M,  
646 Goldstein BP, Schranz J, Krause DS, Walsh TJ, Anidulafungin Study G. 2007.  
647 Anidulafungin versus fluconazole for invasive candidiasis. N Engl J Med 356:2472-82.  
648 <https://www.ncbi.nlm.nih.gov/pubmed/17568028>.
- 649 13. Timsit JF, Azoulay E, Schwebel C, Charles PE, Cornet M, Souweine B, Klouche K,  
650 Jaber S, Trouillet JL, Bruneel F, Argaud L, Cousson J, Meziani F, Gruson D, Paris A,  
651 Darmon M, Garrouste-Orgeas M, Navellou JC, Foucrier A, Allaouchiche B, Das V,  
652 Gangneux JP, Ruckly S, Maubon D, Jullien V, Wolff M, Group ET. 2016. Empirical  
653 Micafungin Treatment and Survival Without Invasive Fungal Infection in Adults With ICU-  
654 Acquired Sepsis, Candida Colonization, and Multiple Organ Failure: The EMPIRICUS  
655 Randomized Clinical Trial. JAMA 316:1555-1564.  
656 <https://www.ncbi.nlm.nih.gov/pubmed/27706483>.
- 657 14. Horn DL, Ostrosky-Zeichner L, Morris MI, Ullmann AJ, Wu C, Buell DN, Kovanda LL,  
658 Cornely OA. 2010. Factors related to survival and treatment success in invasive  
659 candidiasis or candidemia: a pooled analysis of two large, prospective, micafungin trials.

- 660 Eur J Clin Microbiol Infect Dis 29:223-9.
- 661 <https://www.ncbi.nlm.nih.gov/pubmed/20013016>.
- 662 15. Goralska K, Blaszkowska J, Dzikowiec M. 2018. Neuroinfections caused by fungi.
- 663 Infection 46:443-459. <https://www.ncbi.nlm.nih.gov/pubmed/29785613>.
- 664 16. Benedict K, Jackson BR, Chiller T, Beer KD. 2019. Estimation of Direct Healthcare
- 665 Costs of Fungal Diseases in the United States. Clin Infect Dis 68:1791-1797.
- 666 <https://www.ncbi.nlm.nih.gov/pubmed/30204844>.
- 667 17. Wan Ismail WNA, Jasmi N, Khan TM, Hong YH, Neoh CF. 2020. The Economic Burden
- 668 of Candidemia and Invasive Candidiasis: A Systematic Review. Value Health Reg
- 669 Issues 21:53-58. <https://www.ncbi.nlm.nih.gov/pubmed/31648147>.
- 670 18. Neoh CF, Liew D, Slavin MA, Marriott D, Chen SC, Morrissey O, Stewart K, Kong DC.
- 671 2013. Economic evaluation of micafungin vs. liposomal amphotericin B (LAmB) for the
- 672 treatment of candidaemia and invasive candidiasis (IC). Mycoses 56:532-42.
- 673 <https://www.ncbi.nlm.nih.gov/pubmed/23496163>.
- 674 19. Salazar SB, Simoes RS, Pedro NA, Pinheiro MJ, Carvalho M, Mira NP. 2020. An
- 675 Overview on Conventional and Non-Conventional Therapeutic Approaches for the
- 676 Treatment of Candidiasis and Underlying Resistance Mechanisms in Clinical Strains. J
- 677 Fungi (Basel) 6. <https://www.ncbi.nlm.nih.gov/pubmed/32050673>.
- 678 20. Ben-Ami R. 2018. Treatment of Invasive Candidiasis: A Narrative Review. Journal of
- 679 fungi (Basel, Switzerland) 4:97. <https://pubmed.ncbi.nlm.nih.gov/30115843>
- 680 <https://www.ncbi.nlm.nih.gov/pmc/articles/PMC6162658/>.
- 681 21. CDC. 2018. Fungal Diseases: Aspergillus.
- 682 <https://www.cdc.gov/fungal/diseases/aspergillosis/definition.html>.
- 683 <https://www.cdc.gov/fungal/diseases/aspergillosis/definition.html>.
- 684 22. Pappas PG, Kauffman CA, Andes DR, Clancy CJ, Marr KA, Ostrosky-Zeichner L, Reboli
- 685 AC, Schuster MG, Vazquez JA, Walsh TJ, Zaoutis TE, Sobel JD. 2015. Clinical Practice

- 686           Guideline for the Management of Candidiasis: 2016 Update by the Infectious Diseases  
687           Society of America. *Clinical Infectious Diseases* 62:e1-e50.  
688           <https://doi.org/10.1093/cid/civ933>.
- 689   23.    Allen U. 2010. Antifungal agents for the treatment of systemic fungal infections in  
690           children. *Paediatrics & Child Health* 15:603-608.  
691           <https://academic.oup.com/pch/article/15/9/603/2639452>.
- 692   24.    Dupont B. 2002. Overview of the lipid formulations of amphotericin B. *J Antimicrob*  
693           *Chemother* 49 Suppl 1:31-6. <https://www.ncbi.nlm.nih.gov/pubmed/11801578>.
- 694   25.    Tonin FS, Steimbach LM, Borba HH, Sanches AC, Wiens A, Pontarolo R, Fernandez-  
695           Llimos F. 2017. Efficacy and safety of amphotericin B formulations: a network meta-  
696           analysis and a multicriteria decision analysis. *J Pharm Pharmacol* 69:1672-1683.  
697           <https://www.ncbi.nlm.nih.gov/pubmed/28815602>.
- 698   26.    Ambati S, Ellis EC, Lin J, Lin X, Lewis ZA, Meagher RB. 2019. Dectin-2-Targeted  
699           Antifungal Liposomes Exhibit Enhanced Efficacy. *mSphere* 4:1-16.  
700           <https://www.ncbi.nlm.nih.gov/pubmed/31666315>.
- 701   27.    Ambati S, Ferarro AR, Kang SE, Lin J, Lin X, Momany M, Lewis ZA, Meagher RB. 2019.  
702           Dectin-1-Targeted Antifungal Liposomes Exhibit Enhanced Efficacy. *mSphere* 4:1-15.  
703           <https://www.ncbi.nlm.nih.gov/pubmed/30760610>.
- 704   28.    Meagher R, Lewis Z, Ambati S, Lin X. 2021. Aiming for a bull's-eye: Targeting  
705           antifungals to fungi with dectin-decorated liposomes. *PLoS Pathog* 17:e1009699.  
706           <https://www.ncbi.nlm.nih.gov/pubmed/34293050>.
- 707   29.    Dominguez E, Zarnowski R, Sanchez H, Covelli AS, Westler WM, Azadi P, Nett J,  
708           Mitchell AP, Andes DR. 2018. Conservation and Divergence in the *Candida* Species  
709           Biofilm Matrix Mannan-Glucan Complex Structure, Function, and Genetic Control. *MBio*  
710           9. <https://www.ncbi.nlm.nih.gov/pubmed/29615504>.

- 711 30. Ambati S, Ellis EC, Pham T, Lewis ZA, Lin X, Meagher RB. 2021. Antifungal Liposomes  
712 Directed by Dectin-2 Offer a Promising Therapeutic Option for Pulmonary Aspergillosis.  
713 mBio 12:1-8. <https://www.ncbi.nlm.nih.gov/pubmed/33622715>.
- 714 31. Koh AY, Köhler JR, Coggshall KT, Van Rooijen N, Pier GB. 2008. Mucosal Damage and  
715 Neutropenia Are Required for *Candida albicans* Dissemination. PLOS Pathogens 4:e35.  
716 <https://doi.org/10.1371/journal.ppat.0040035>.
- 717 32. Andes D, Diekema DJ, Pfaller MA, Prince RA, Marchillo K, Ashbeck J, Hou J. 2008. In  
718 vivo pharmacodynamic characterization of anidulafungin in a neutropenic murine  
719 candidiasis model. Antimicrobial agents and chemotherapy 52:539-550.  
720 <https://pubmed.ncbi.nlm.nih.gov/18070979>  
721 <https://www.ncbi.nlm.nih.gov/pmc/articles/PMC2224754/>.
- 722 33. Andes D, Safdar N, Marchillo K, Conklin R. 2006. Pharmacokinetic-pharmacodynamic  
723 comparison of amphotericin B (AMB) and two lipid-associated AMB preparations,  
724 liposomal AMB and AMB lipid complex, in murine candidiasis models. Antimicrob Agents  
725 Chemother 50:674-84. <https://www.ncbi.nlm.nih.gov/pubmed/16436726>.
- 726 34. Olson JA, Adler-Moore JP, Smith PJ, Proffitt RT. 2005. Treatment of *Candida glabrata*  
727 infection in immunosuppressed mice by using a combination of liposomal amphotericin B  
728 with caspofungin or micafungin. Antimicrob Agents Chemother 49:4895-902.  
729 <https://www.ncbi.nlm.nih.gov/pubmed/16304150>.
- 730 35. Andes D, Stamsted T, Conklin R. 2001. Pharmacodynamics of amphotericin B in a  
731 neutropenic-mouse disseminated-candidiasis model. Antimicrob Agents Chemother  
732 45:922-6. <https://www.ncbi.nlm.nih.gov/pubmed/11181381>.
- 733 36. Verma A, Auzinger G, Kantecki M, Campling J, Spurdan D, Percival F, Heaton N. 2017.  
734 Safety and Efficacy of Anidulafungin for Fungal Infection in Patients With Liver  
735 Dysfunction or Multiorgan Failure. Open Forum Infect Dis 4:ofw241.  
736 <https://www.ncbi.nlm.nih.gov/pubmed/28480239>.

- 737 37. Chen SCA, Slavin MA, Sorrell TC. 2011. Echinocandin Antifungal Drugs in Fungal  
738 Infections. *Drugs* 71:11-41. <https://doi.org/10.2165/11585270-000000000-00000>.
- 739 38. Andes D, Diekema DJ, Pfaller MA, Bohrmuller J, Marchillo K, Lepak A. 2010. In vivo  
740 comparison of the pharmacodynamic targets for echinocandin drugs against *Candida*  
741 species. *Antimicrob Agents Chemother* 54:2497-506.  
742 <https://www.ncbi.nlm.nih.gov/pubmed/20385855>.
- 743 39. Vera-González N, Bailey-Hytholt CM, Langlois L, de Camargo Ribeiro F, de Souza  
744 Santos EL, Junqueira JC, Shukla A. 2020. Anidulafungin liposome nanoparticles exhibit  
745 antifungal activity against planktonic and biofilm *Candida albicans*. *J Biomed Mater Res*  
746 108:2263-2276. <https://onlinelibrary.wiley.com/doi/abs/10.1002/jbm.a.36984>.
- 747 40. Sanati H, Ramos CF, Bayer AS, Ghannoum MA. 1997. Combination therapy with  
748 amphotericin B and fluconazole against invasive candidiasis in neutropenic-mouse and  
749 infective-endocarditis rabbit models. *Antimicrob Agents Chemother* 41:1345-8.  
750 <https://www.ncbi.nlm.nih.gov/pubmed/9174196>.
- 751 41. Ju JY, Polhamus C, Marr KA, Holland SM, Bennett JE. 2002. Efficacies of fluconazole,  
752 caspofungin, and amphotericin B in *Candida glabrata*-infected p47phox<sup>-/-</sup> knockout  
753 mice. *Antimicrobial agents and chemotherapy* 46:1240-1245.  
754 <https://pubmed.ncbi.nlm.nih.gov/11959551>  
755 <https://www.ncbi.nlm.nih.gov/pmc/articles/PMC127175/>.
- 756 42. Ramana LN, Sharma S, Sethuraman S, Ranga U, Krishnan UM. 2015. Stealth anti-CD4  
757 conjugated immunoliposomes with dual antiretroviral drugs--modern Trojan horses to  
758 combat HIV. *Eur J Pharm Biopharm* 89:300-11.  
759 <http://www.ncbi.nlm.nih.gov/pubmed/25500283>.
- 760 43. Immordino ML, Dosio F, Cattel L. 2006. Stealth liposomes: review of the basic science,  
761 rationale, and clinical applications, existing and potential. *Int J Nanomedicine* 1:297-315.  
762 <http://www.ncbi.nlm.nih.gov/pubmed/17717971>.

- 763 44. Allen TM, Hansen C. 1991. Pharmacokinetics of stealth versus conventional liposomes:  
764 effect of dose. *Biochim Biophys Acta* 1068:133-41.  
765 <https://www.ncbi.nlm.nih.gov/pubmed/1911826>.
- 766 45. Tenchov R. 2021. Understanding the nanotechnology in COVID-19 vaccines. *CAS*:1-15.  
767 <https://www.cas.org/resource/blog/understanding-nanotechnology-covid-19-vaccines>.
- 768 46. Saijo S, Ikeda S, Yamabe K, Kakuta S, Ishigame H, Akitsu A, Fujikado N, Kusaka T,  
769 Kubo S, Chung SH, Komatsu R, Miura N, Adachi Y, Ohno N, Shibuya K, Yamamoto N,  
770 Kawakami K, Yamasaki S, Saito T, Akira S, Iwakura Y. 2010. Dectin-2 recognition of  
771 alpha-mannans and induction of Th17 cell differentiation is essential for host defense  
772 against *Candida albicans*. *Immunity* 32:681-91.  
773 <https://www.ncbi.nlm.nih.gov/pubmed/20493731>.
- 774 47. Davis SE, Hopke A, Minkin SC, Jr., Montedonico AE, Wheeler RT, Reynolds TB. 2014.  
775 Masking of beta(1-3)-glucan in the cell wall of *Candida albicans* from detection by innate  
776 immune cells depends on phosphatidylserine. *Infect Immun* 82:4405-13.  
777 <https://www.ncbi.nlm.nih.gov/pubmed/25114110>.
- 778 48. Chen SM, Zou Z, Qiu XR, Hou WT, Zhang Y, Fang W, Chen YL, Wang YD, Jiang YY,  
779 Shen H, An MM. 2019. The critical role of Dectin-1 in host controlling systemic *Candida*  
780 *krusei* infection. *American journal of translational research* 11:721-732.  
781 <https://pubmed.ncbi.nlm.nih.gov/30899374>  
782 <https://www.ncbi.nlm.nih.gov/pmc/articles/PMC6413270/>.
- 783 49. Yang M, Solis NV, Marshall M, Garleb R, Zhou T, Wang D, Swidergall M, Pearlman E,  
784 Filler SG, Liu H. 2020. Control of  $\beta$ -glucan exposure by the endo-1,3-glucanase Eng1 in  
785 *Candida albicans* modulates virulence. *bioRxiv*  
786 doi:10.1101/2020.09.07.285791:2020.09.07.285791.  
787 <http://biorxiv.org/content/early/2020/09/07/2020.09.07.285791.abstract>.



- 788 50. Bain JM, Louw J, Lewis LE, Okai B, Walls CA, Ballou ER, Walker LA, Reid D, Munro  
789 CA, Brown AJ, Brown GD, Gow NA, Erwig LP. 2014. *Candida albicans* hypha formation  
790 and mannan masking of beta-glucan inhibit macrophage phagosome maturation. MBio  
791 5:e01874. <https://www.ncbi.nlm.nih.gov/pubmed/25467440>.
- 792 51. Pradhan A, Avelar GM, Bain JM, Childers DS, Larcombe DE, Netea MG, Shekhova E,  
793 Munro CA, Brown GD, Erwig LP, Gow NAR, Brown AJP. 2018. Hypoxia Promotes  
794 Immune Evasion by Triggering beta-Glucan Masking on the *Candida albicans* Cell  
795 Surface via Mitochondrial and cAMP-Protein Kinase A Signaling. MBio 9.  
796 <https://www.ncbi.nlm.nih.gov/pubmed/30401773>.
- 797 52. Thompson A, Griffiths JS, Walker L, da Fonseca DM, Lee KK, Taylor PR, Gow NAR, Orr  
798 SJ. 2019. Dependence on Dectin-1 Varies With Multiple Candida Species. Frontiers in  
799 Microbiology 10. <https://www.frontiersin.org/article/10.3389/fmicb.2019.01800>.
- 800 53. Mathe L, Van Dijck P. 2013. Recent insights into *Candida albicans* biofilm resistance  
801 mechanisms. Curr Genet 59:251-64. <https://www.ncbi.nlm.nih.gov/pubmed/23974350>.
- 802 54. Taff HT, Mitchell KF, Edward JA, Andes DR. 2013. Mechanisms of Candida biofilm drug  
803 resistance. Future Microbiol 8:1325-37. <https://www.ncbi.nlm.nih.gov/pubmed/24059922>.
- 804 55. Singh R, Kumari A, Kaur K, Sethi P, Chakrabarti A. 2018. Relevance of antifungal  
805 penetration in biofilm-associated resistance of *Candida albicans* and non-albicans  
806 *Candida species*. J Med Microbiol 67:922-926.  
807 <https://www.ncbi.nlm.nih.gov/pubmed/29767615>.
- 808 56. Chandra J, Mukherjee PK, Ghannoum MA. 2012. Candida biofilms associated with CVC  
809 and medical devices. Mycoses 55:46-57.  
810 <https://onlinelibrary.wiley.com/doi/abs/10.1111/j.1439-0507.2011.02149.x>.
- 811 57. Kojic EM, Darouiche RO. 2004. Candida infections of medical devices. Clin Microbiol  
812 Rev 17:255-67. <https://www.ncbi.nlm.nih.gov/pubmed/15084500>.



- 813 58. Kuhn DM, George T, Chandra J, Mukherjee PK, Ghannoum MA. 2002. Antifungal  
814 susceptibility of *Candida* biofilms: unique efficacy of amphotericin B lipid formulations  
815 and echinocandins. *Antimicrob Agents Chemother* 46:1773-80.  
816 <https://www.ncbi.nlm.nih.gov/pubmed/12019089>.
- 817 59. Lopez-Berestein G, Rosenblum MG, Mehta R. 1984. Altered tissue distribution of  
818 amphotericin B by liposomal encapsulation: comparison of normal mice to mice infected  
819 with *Candida albicans*. *Cancer Drug Deliv* 1:199-205.  
820 <https://www.ncbi.nlm.nih.gov/pubmed/6399857>.
- 821 60. Mehta R, Lopez-Berestein G, Hopfer R, Mills K, Juliano RL. 1984. Liposomal  
822 amphotericin B is toxic to fungal cells but not to mammalian cells. *Biochim Biophys Acta*  
823 770:230-4. <https://www.ncbi.nlm.nih.gov/pubmed/6696909>.
- 824 61. van Etten EW, Otte-Lambillion M, van Vianen W, ten Kate MT, Bakker-Woudenberg AJ.  
825 1995. Biodistribution of liposomal amphotericin B (AmBisome) and amphotericin B-  
826 desoxycholate (Fungizone) in uninfected immunocompetent mice and leucopenic mice  
827 infected with *Candida albicans*. *J Antimicrob Chemother* 35:509-19.  
828 <https://www.ncbi.nlm.nih.gov/pubmed/7628985>.
- 829 62. Walker L, Sood P, Lenardon MD, Milne G, Olson J, Jensen G, Wolf J, Casadevall A,  
830 Adler-Moore J, Gow NAR. 2018. The Viscoelastic Properties of the Fungal Cell Wall  
831 Allow Traffic of AmBisome as Intact Liposome Vesicles. *MBio* 9.  
832 <https://www.ncbi.nlm.nih.gov/pubmed/29437927>.
- 833 63. Wong-Beringer A, Jacobs RA, Guglielmo BJ. 1998. Lipid formulations of amphotericin B:  
834 clinical efficacy and toxicities. *Clin Infect Dis* 27:603-18.  
835 <https://www.ncbi.nlm.nih.gov/pubmed/9770163>.
- 836 64. Chastain DB, Giles RL, Bland CM, Franco-Paredes C, Henao-Martinez AF, Young HN.  
837 2019. A clinical pharmacist survey of prophylactic strategies used to prevent adverse

- 838 events of lipid-associated formulations of amphotericin B. *Infect Dis (Lond)* 51:380-383.  
839 <https://www.ncbi.nlm.nih.gov/pubmed/30773080>.
- 840 65. Hata K, Horii T, Miyazaki M, Watanabe NA, Okubo M, Sonoda J, Nakamoto K, Tanaka  
841 K, Shirotori S, Murai N, Inoue S, Matsukura M, Abe S, Yoshimatsu K, Asada M. 2011.  
842 Efficacy of oral E1210, a new broad-spectrum antifungal with a novel mechanism of  
843 action, in murine models of candidiasis, aspergillosis, and fusariosis. *Antimicrob Agents*  
844 *Chemother* 55:4543-51. <https://www.ncbi.nlm.nih.gov/pubmed/21788462>.
- 845 66. Queiroz-Telles F, Berezin E, Leverger G, Freire A, van der Vyver A, Chotpitayasunondh  
846 T, Konja J, Diekmann-Berndt H, Koblinger S, Groll AH, Arrieta A, Micafungin Invasive  
847 Candidiasis Study G. 2008. Micafungin versus liposomal amphotericin B for pediatric  
848 patients with invasive candidiasis: substudy of a randomized double-blind trial. *Pediatr*  
849 *Infect Dis J* 27:820-6. <https://www.ncbi.nlm.nih.gov/pubmed/18679151>.
- 850 67. Ikeda F, Wakai Y, Matsumoto S, Maki K, Watabe E, Tawara S, Goto T, Watanabe Y,  
851 Matsumoto F, Kuwahara S. 2000. Efficacy of FK463, a new lipopeptide antifungal agent,  
852 in mouse models of disseminated candidiasis and aspergillosis. *Antimicrob Agents*  
853 *Chemother* 44:614-8. <https://www.ncbi.nlm.nih.gov/pubmed/10681327>.
- 854 68. Keppler-Ross S, Douglas L, Konopka JB, Dean N. 2010. Recognition of yeast by murine  
855 macrophages requires mannan but not glucan. *Eukaryot Cell* 9:1776-87.  
856 <https://www.ncbi.nlm.nih.gov/pubmed/20833894>.
- 857 69. Fonzi WA, Irwin MY. 1993. Isogenic strain construction and gene mapping in *Candida*  
858 *albicans*. *Genetics* 134:717-28. <https://www.ncbi.nlm.nih.gov/pubmed/8349105>.
- 859 70. [www.gpo.gov](http://www.gpo.gov). 2012. US Code, Title 7: Chapter 54—Transportation, Sale, and Handling  
860 of Certain Animals  
861 [http://www.gpo.gov/fdsys/browse/collectionUScode.action?collectionCode=USCODE&se](http://www.gpo.gov/fdsys/browse/collectionUScode.action?collectionCode=USCODE&searchPath=Title+7%2FCHAPTER+54&oldPath=Title+7%2FCHAPTER+55A&isCollapsed=true&selectedYearFrom=2012&ycord=2250)  
862 [archPath=Title+7%2FCHAPTER+54&oldPath=Title+7%2FCHAPTER+55A&isCollapsed](http://www.gpo.gov/fdsys/browse/collectionUScode.action?collectionCode=USCODE&searchPath=Title+7%2FCHAPTER+54&oldPath=Title+7%2FCHAPTER+55A&isCollapsed=true&selectedYearFrom=2012&ycord=2250)  
863 [=true&selectedYearFrom=2012&ycord=2250](http://www.gpo.gov/fdsys/browse/collectionUScode.action?collectionCode=USCODE&searchPath=Title+7%2FCHAPTER+54&oldPath=Title+7%2FCHAPTER+55A&isCollapsed=true&selectedYearFrom=2012&ycord=2250).

- 864 71. Livak KJ, Schmittgen TD. 2001. Analysis of relative gene expression data using real-  
865 time quantitative PCR and the 2(-Delta Delta C(T)) Method. *Methods* 25:402-408.  
866 <http://www.ncbi.nlm.nih.gov/entrez/query.fcgi?cmd=Retrieve&db=PubMed&dopt=Citation>  
867 [http://www.ncbi.nlm.nih.gov/entrez/query.fcgi?cmd=Retrieve&db=PubMed&dopt=Citation](http://www.ncbi.nlm.nih.gov/entrez/query.fcgi?cmd=Retrieve&db=PubMed&dopt=Citation&list_uids=11846609)  
868 72. Thompson HW, Mera R, Prasad C. 1998. A Description of the Appropriate Use of  
869 Student's t-Test. *Nutr Neurosci* 1:165-72.  
870 <https://www.ncbi.nlm.nih.gov/pubmed/27406022>.  
871 73. Meagher RB, Lewis ZA, Lin X, Momany M. 2019. Targeted Nanoparticles and Their  
872 Uses Related to Fungal Infections. United StatesWO/2020/146514.  
873 [https://patentscope.wipo.int/search/en/detail.jsf?docId=WO2020146514&\\_cid=P11-](https://patentscope.wipo.int/search/en/detail.jsf?docId=WO2020146514&_cid=P11-)  
874 [KHDI99-36314-1](https://patentscope.wipo.int/search/en/detail.jsf?docId=WO2020146514&_cid=P11-KHDI99-36314-1).  
875
